# Supplementary material for: SARS-CoV-2 Seroprevalence Structure of the Russian Population during the COVID-19 Pandemic
Source: MDPI journal article supplement (doi:10.3390/v13081648), 2021-08-19
Supplement: s1 [file s1]

## Supplementary materials

**Table S1. Region and age related volunteer cohort patterns [1].**

| Region                 | Number of<br>volunteers<br>examined | Sample size in various age groups (yrs). individuals |        |        |        |        |        |      |
|------------------------|-------------------------------------|------------------------------------------------------|--------|--------|--------|--------|--------|------|
|                        |                                     | 1-17                                                 | 18-29  | 30-39  | 40-49  | 50-59  | 60-69  | 70+  |
| Amur region            | 2936                                | 385                                                  | 392    | 427    | 456    | 458    | 452    | 366  |
| Astrakhan Region       | 2689                                | 286                                                  | 385    | 391    | 376    | 386    | 381    | 384  |
| Belgorod Region        | 2806                                | 392                                                  | 383    | 387    | 396    | 389    | 401    | 458  |
| Vladimir Region        | 2798                                | 302                                                  | 225    | 585    | 714    | 584    | 336    | 52   |
| Irkutsk Region         | 2674                                | 387                                                  | 385    | 373    | 374    | 386    | 390    | 379  |
| Kaliningrad Region     | 2939                                | 317                                                  | 395    | 465    | 488    | 493    | 465    | 316  |
| Krasnodar Territory    | 2999                                | 427                                                  | 366    | 363    | 460    | 494    | 452    | 437  |
| Krasnoyarsk Territory  | 2807                                | 402                                                  | 409    | 440    | 441    | 449    | 420    | 246  |
| Leningrad Region       | 3130                                | 401                                                  | 464    | 474    | 510    | 480    | 422    | 379  |
| Moscow                 | 2688                                | 384                                                  | 384    | 384    | 384    | 384    | 383    | 385  |
| Moscow Region          | 2688                                | 384                                                  | 384    | 384    | 384    | 384    | 384    | 384  |
| Murmansk Region        | 3117                                | 378                                                  | 429    | 478    | 510    | 517    | 417    | 388  |
| Nizhny Novgorod Region | 2687                                | 266                                                  | 367    | 495    | 481    | 439    | 337    | 302  |
| Novosibirsk Region     | 2728                                | 388                                                  | 399    | 388    | 391    | 409    | 376    | 377  |
| Primorsky Territory    | 2684                                | 380                                                  | 384    | 384    | 384    | 384    | 384    | 384  |
| Republic of Crimea     | 2896                                | 314                                                  | 447    | 563    | 407    | 451    | 336    | 378  |
| Rostov Region          | 3048                                | 404                                                  | 394    | 453    | 512    | 440    | 453    | 392  |
| St. Petersburg         | 2713                                | 377                                                  | 390    | 416    | 395    | 413    | 442    | 280  |
| Saratov Region         | 3369                                | 409                                                  | 474    | 653    | 634    | 541    | 432    | 226  |
| Sverdlovsk Region      | 3149                                | 404                                                  | 438    | 515    | 431    | 493    | 461    | 407  |
| Stavropol Territory    | 2683                                | 383                                                  | 379    | 385    | 384    | 383    | 384    | 385  |
| Republic of Tatarstan  | 2926                                | 400                                                  | 400    | 448    | 461    | 448    | 382    | 387  |
| Tula Region            | 2894                                | 426                                                  | 392    | 436    | 424    | 424    | 409    | 383  |
| Tyumen Region          | 2758                                | 356                                                  | 485    | 452    | 447    | 482    | 387    | 149  |
| Khabarovsk Territory   | 2675                                | 383                                                  | 385    | 383    | 382    | 382    | 380    | 380  |
| Chelyabinsk Region     | 2677                                | 370                                                  | 344    | 406    | 413    | 382    | 390    | 372  |
| Total                  | 74 158                              | 9705                                                 | 10 279 | 11 528 | 11 639 | 11 475 | 10 456 | 8976 |

**Table S2. Volunteer numbers. by administrative region.**

| Region                 | Primary number. people | Number of volunteers in each phase |                       |                       |
|------------------------|------------------------|------------------------------------|-----------------------|-----------------------|
|                        |                        | 1 <sup>st</sup> phase              | 2 <sup>nd</sup> phase | 3 <sup>rd</sup> phase |
| Amur region            | 2936                   | 2116                               | 1973                  | 2116                  |
| Astrakhan region       | 2689                   | 1263                               | 1170                  | 1263                  |
| Belgorod region        | 2806                   | 1722                               | 1623                  | 1722                  |
| Chelyabinsk region     | 2677                   | 1371                               | 1076                  | 1371                  |
| Irkutsk region         | 2674                   | 1940                               | 1491                  | 1938                  |
| Kaliningrad region     | 2939                   | 2036                               | 1702                  | 2036                  |
| Khabarovsk territory   | 2675                   | 1610                               | 1312                  | 1687                  |
| Krasnodar Territory    | 2999                   | 1987                               | 1588                  | 1990                  |
| Krasnoyarsk territory  | 2807                   | 1809                               | 1594                  | 1806                  |
| Leningrad region       | 3130                   | 1744                               | 1455                  | 1743                  |
| Moscow city            | 2688                   | 385                                | 641                   | 642                   |
| Moscow region          | 2688                   | 1252                               | 1078                  | 1251                  |
| Murmansk region        | 3117                   | 1750                               | 1539                  | 1750                  |
| Nizhny Novgorod Region | 2687                   | 1314                               | 1055                  | 1315                  |
| Novosibirsk region     | 2728                   | 1651                               | 1723                  | 1651                  |
| Primorsky territory    | 2684                   | 1468                               | 1151                  | 1467                  |
| Republic of Crimea     | 2896                   | 1452                               | 1090                  | 1450                  |
| Republic of Tatarstan  | 2926                   | 2858                               | 2858                  | 2858                  |
| Rostov region          | 3048                   | 2010                               | 1587                  | 2012                  |
| Saratov region         | 3369                   | 1502                               | 1077                  | 1500                  |
| St. Petersburg city    | 2713                   | 1791                               | 1518                  | 1791                  |
| Stavropol Territory    | 2683                   | 1011                               | 900                   | 1011                  |
| Sverdlovsk region      | 3149                   | 2044                               | 1548                  | 2044                  |
| Tula region            | 2894                   | 1800                               | 1591                  | 1800                  |
| Tyumen region          | 2758                   | 1900                               | 1555                  | 1900                  |
| Vladimir region        | 2798                   | 1215                               | 863                   | 1215                  |
| Total                  | 74158                  | 43396                              | 36304                 | 42426                 |

**Table S3. Distribution of (SARS-CoV-2) seropositive volunteer proportions.**

| Region                 | Percent seropositive volunteers. by age (years) (M. 95% CI. %) |                     |                    |                    |                    |                    |                    |                   |                     |
|------------------------|----------------------------------------------------------------|---------------------|--------------------|--------------------|--------------------|--------------------|--------------------|-------------------|---------------------|
|                        | 1-17                                                           | 18-19               | 20-29              | 30-39              | 40-49              | 50-59              | 60-69              | 70+               | Итого по когорте    |
| Amur region            | 61.6*<br>56.5-66.4                                             | 49.2<br>44.2-54.3   | 36.3*<br>31.7-41.1 | 36.3*<br>31.7-41.1 | 40.1<br>35.6-44.8  | 41.5<br>36.9-46.2  | 45.6<br>40.9-50.3  | 45.9<br>40.7-41.2 | 45.4*<br>43.6-47.2  |
| Astrakhan region       | 43*<br>38.0-48.1                                               | 20.3**<br>16.4-24.6 | 23.3<br>19.2-27.8  | 23.3<br>19.2-27.8  | 22.1<br>17.9-26.6  | 19.7*<br>15.8-24.0 | 17.6*<br>13.9-21.8 | 45.1<br>40.0-50.2 | 27.3*<br>26.7-30.2  |
| Belgorod region        | 10.7<br>8.5-16.1                                               | 7.3<br>4.9-10.4     | 7.5<br>5.1-10.6    | 7.5<br>5.1-10.6    | 10.6<br>7.8-14.1   | 8.2<br>5.7-11.4    | 9.5<br>6.8-12.8    | 7.2<br>5.0-9.9    | 8.4*<br>7.4-9.5     |
| Vladimir region        | 19.9<br>15.5-24.8                                              | 7.5<br>4.5-11.8     | 8.7<br>6.6-11.3    | 8.7<br>6.6-11.3    | 8.4<br>6.5-10.7    | 11.6<br>9.2-14.5   | 9.8<br>6.9-13.5    | 19.2<br>9.6-32.5  | 10.7<br>9.6-11.9    |
| Irkutsk region         | 8<br>5.5-11.2                                                  | 6.8<br>4.5-9.7      | 4<br>2.3-6.6       | 4<br>2.3-6.6       | 4.3<br>2.5-6.9     | 4.4<br>2.6-6.9     | 3.6<br>1.9-5.9     | 9.2<br>6.5-12.6   | 5.8*<br>4.9-6.7     |
| Kaliningrad region     | 66.9*<br>61.4-72.0                                             | 57<br>51.9-61.9     | 47.3<br>42.7-1.9   | 47.3<br>42.7-51.9  | 51<br>46.5-55.5    | 44.2<br>39.8-48.7  | 46<br>41.4-50.7    | 43.4<br>37.8-49.0 | 50.2*<br>48.4-52.0  |
| Krasnodar Territory    | 6.8<br>4.6-9.6                                                 | 5.7<br>3.6-8.6      | 5.8<br>3.6-8.7     | 5.8<br>3.6-8.7     | 5.0<br>3.2-7.4     | 6.7<br>4.6-9.3     | 7.3<br>5.1-10.1    | 18.3<br>14.8-22.3 | 8*<br>7.1-9.0       |
| Krasnoyarsk territory  | 13.2<br>10.0-16.9                                              | 15.2<br>11.8-19.0   | 9.8<br>7.2 -12.9   | 9.8<br>7.2 - 12.9  | 11.1<br>8.3 - 14.4 | 11.4<br>8.6 - 14.7 | 13.3<br>10.2-16.9  | 13.4<br>9.4-18.3  | 12.4<br>11.2 - 13.6 |
| Leningrad region       | 26.9*<br>22.7-31.6                                             | 17.7<br>14.3-21.5   | 20.5<br>16.9-4.4   | 20.5<br>16.9-24.4  | 17.2<br>14.1-20.8  | 17.7<br>14.4-21.4  | 18.5<br>14.9-22.5  | 29.0<br>24.5-33.9 | 20.7<br>19.3-22.2   |
| Moscow city            | 37*<br>32.1-42.0                                               | 15.9*<br>12.4-19.9  | 16.7<br>13.1-20.8  | 16.7<br>13.1-20.8  | 17.2<br>13.6-21.3  | 23.2<br>19.1-27.7  | 24.5<br>20.3-29.2  | 20.5<br>6.6-24.9  | 22.1<br>20.6-23.8   |
| Moscow region          | 26<br>21.7-30.7                                                | 16.4<br>12.8-20.5   | 21.6<br>17.6-26.1  | 21.6<br>17.6-26.1  | 22.1<br>18.1-26.6  | 22.1<br>18.1-26.6  | 21.1<br>17.1-25.5  | 17.7<br>14.0-21.9 | 21<br>19.5-22.6     |
| Murmansk region        | 37.3<br>32.4-42.4                                              | 37.1<br>32.5-41.8   | 40.2<br>35.7-44.7  | 40.2<br>35.7-44.7  | 34.7<br>30.6-39.0  | 26.5<br>22.7-30.5  | 20.4<br>16.6-24.6  | 20.9<br>16.9-25.3 | 31.2*<br>29.6-32.8  |
| Nizhny Novgorod Region | 10.2<br>6.8-14.4                                               | 6<br>3.8-8.9        | 7.5<br>5.3 -10.2   | 7.5<br>5.3 - 10.2  | 9.8<br>7.3 - 12.8  | 8.4<br>6.0 -11.4   | 9.5<br>6.6 - 13.1  | 7.6<br>4.9-11.2   | 8.4*<br>7.4 - 9.5   |
| Novosibirsk region     | 13.1<br>9.9-16.9                                               | 5.5<br>3.5-8.2      | 4.9<br>2.9-7.5     | 4.9<br>2.9-7.5     | 9.7<br>6.9-13.1    | 7.6<br>5.2-10.6    | 8.0<br>5.5-11.2    | 14.9<br>11.4-18.9 | 9*<br>8.0-10.2      |
| Primorsky territory    | 23.9                                                           | 13.3*               | 17.4               | 17.4               | 22.4               | 21.9               | 19.5               | 19 1              | 19.6                |

|                       |                     |                   |                    |                   |                   |                    |                    |                    |                     |
|-----------------------|---------------------|-------------------|--------------------|-------------------|-------------------|--------------------|--------------------|--------------------|---------------------|
|                       | 19.7-28.6           | 10.1-17.1         | 13.8-21.6          | 13.8-21.6         | 18.3-26.9         | 17.8-26.4          | 15.7-23.9          | 5.2-23.3           | 18.2-21.2           |
| Republic of Crimea    | 2.5<br>1.1-4.9      | 5.4<br>3.5-7.9    | 4.4<br>2.9-6.5     | 4.4<br>2.9-6.5    | 5.9<br>3.8-8.7    | 5.3<br>3.4-7.8     | 4.2<br>2.3-6.9     | 1.6<br>0.6-3.4     | 4.3*<br>3.6-5.1     |
| Republic of Tatarstan | 39.2*<br>34.4-44.2  | 32.2<br>27.7-7.1  | 30.6<br>26.3-35.1  | 30.6<br>26.3-35.1 | 28.4<br>24.3-32.8 | 34.4<br>29.9-38.9  | 31.7<br>27.0-36.6  | 24<br>19.9-28.6    | 31.5 *<br>29.8-33.2 |
| Rostov region         | 30.7*<br>26.2-35.4  | 13.5<br>10.2-17.2 | 12.8<br>9.9-16.2   | 12.8<br>9.9-16.2  | 16.0<br>12.9-19.5 | 14.5<br>11.4-18.2  | 16.3<br>13.1-20.1  | 12.5<br>9.4-16.2   | 16.5<br>15.2-17.9   |
| St. Petersburg city   | 32.1<br>27.4-37.1   | 21.3<br>17.3-25.7 | 22.8<br>18.9-27.2  | 22.8<br>18.9-27.2 | 22.3<br>18.3-26.7 | 25.4<br>21.3-29.9  | 29<br>24.8-33.4    | 30.4<br>25.0-36.1  | 26*<br>24.3-27.7    |
| Saratov region        | 18.1<br>14.5-22.2   | 18.8<br>15.4-22.6 | 15.5<br>12.8-18.5  | 15.5<br>12.8-18.5 | 14.5<br>11.9-17.5 | 16.8<br>13.8-20.2  | 15.7<br>12.4-19.5  | 14.6<br>10.3-19.9  | 16.3<br>15.0-17.6   |
| Sverdlovsk region     | 17.8*<br>14.2-21.9  | 11.9<br>9.0-15.3  | 12.8<br>10.1-16.0  | 12.8<br>10.1-16.0 | 7.9<br>5.5-10.9   | 11.6<br>8.9-14.7   | 11.1<br>8.4-14.3   | 14.7<br>11.4-18.6  | 12.4<br>11.3-13.7   |
| Stavropol Territory   | 17.0*<br>13.4- 21.1 | 9.5<br>6.7 -12.9  | 8.1<br>5.5 - 11.2  | 8.1<br>5.5 - 11.2 | 4.7<br>2.8 - 7.3  | 8.6<br>6.0 - 11.9  | 9.9<br>7.1 - 13.3  | 10.6<br>7.8 - 14.2 | 9.8<br>8.7-10.9     |
| Tula region           | 11.3*<br>8.4-14.7   | 12.8<br>9.6-16.5  | 13.3<br>10.3-16.9  | 13.3<br>10.3-16.9 | 15.1<br>11.8-18.9 | 15.3<br>12.0-19.1  | 21.8<br>17.9-26.1  | 22.7<br>18.6-27.2  | 15.9<br>14.6-17.3   |
| Tyumen region         | 26.4<br>21.9-31.3   | 25.8<br>21.9-29.9 | 26.3<br>22.3-30.6  | 26.3<br>22.3-30.6 | 24.2<br>20.3-28.4 | 26.1<br>22.3-30.3  | 22<br>17.9-26.4    | 13.4<br>8.4-19.9   | 24.5<br>22.9-26.2   |
| Khabarovsk territory  | 23.0<br>18.9- 7.5   | 19.0<br>15.2-23.2 | 15.4<br>11.9 -19.4 | 15.4<br>11.9-19.4 | 14.7<br>11.3-18.6 | 20.9<br>16.9- 25.4 | 21.8<br>17.8- 26.3 | 22.6<br>18.5- 27.2 | 19.6<br>18.1 - 21.2 |
| Chelyabinsk region    | 20.3<br>16.3-24.7   | 27.0<br>22.4-32.1 | 18.2<br>14.6-22.3  | 18.2<br>14.6-22.3 | 20.1<br>16.3-24.3 | 18.3<br>14.6-22.6  | 17.7<br>14.0-21.9  | 17.7<br>14.0-21.6  | 19.4<br>17.9-20.9   |
| Median                | 21.6                | 15.6              | 15.6               | 15.45             | 15.6              | 17.2               | 17.7               | 18.0               | 17.95               |
| IQR                   | 13.1 - 31.7         | 8 - 21.1          | 8- 21.1            | 8.2 - 22.6        | 9.7 - 22.2        | 9.3- 22.9          | 9.8- 21.8          | 13.4- 22.6         | 10.0 - 23.9         |

Key: \* - differences are statistically significant (more or less than the median values in the general cohort) ( $p < 0.05$ ). IQR - interquartile range (Q25 – Q75).

**Table S4. Distribution of seropositive, asymptomatic volunteers by age and area of residence.**

| Region                                   | Distribution of seroprevalence by age, years M±m |           |           |           |           |           |           | Total in region |
|------------------------------------------|--------------------------------------------------|-----------|-----------|-----------|-----------|-----------|-----------|-----------------|
|                                          | 1-17                                             | 18-29     | 30-39     | 40-49     | 59-59     | 60-69     | 70+       |                 |
| Amur region                              | 92.0±1.8                                         | 91.2±2.0  | 89.7±2.4  | 95.6±1.5  | 95.3±1.5  | 96.6±1.3  | 98.8±0.8  | 94.1±0.6        |
| Astrakhan region                         | 81.9±2.9                                         | 85.9±3.9  | 81.3±4.1  | 74.7±4.8  | 76.3±4.9  | 98.5±1.5  | 95.4±1.6  | 85.6±1.3        |
| Belgorod region                          | 97.6±2.4                                         | 89.3±5.8  | 96.6±3.4  | 92.9±4.0  | 87.5±5.8  | 97.4±2.6  | 97.0±3.0  | 94.3±1.5        |
| Vladimir region                          | 95.0±2.9                                         | 82.4±9.2  | 96.1±2.7  | 86.7±4.4  | 85.3 ±4.3 | 75.8 ±7.5 | 70.0±14.5 | 87.6 ±2.0       |
| Irkutsk region                           | 96.8±3.1                                         | 69.2±9.0  | 53.3±13   | 62.5±12.1 | 70.6±11.0 | 85.7±9.4  | 100       | 81.2±3.2        |
| Kaliningrad region                       | 96.7±1.2                                         | 94.7±1.5  | 95.5±1.4  | 94.4±1.4  | 94.0±1.6  | 95.3±1.4  | 96.4±1.6  | 95.2±0.6        |
| Krasnodar Territory                      | 100                                              | 100       | 95.2±4.6  | 100       | 100       | 93.9±4.2  | 100       | 98.8±0.7        |
| Krasnoyarsk territory                    | 94.3±2.3                                         | 91.9±2.5  | 97.7±1.6  | 87.8±3.4  | 94.1±2.4  | 94.6±2.2  | 93.3±3.1  | 93.4±0.9        |
| Leningrad region                         | 92.6±4.9                                         | 89.0±6.8  | 84.5±7.2  | 89.8±6.3  | 82.4±8.1  | 80.8±8.7  | 87.3±6.2  | 86.9±2.6        |
| Moscow city                              | 86.6±2.9                                         | 91.8±3.5  | 78.1±5.2  | 84.8±4.4  | 65.2±5.1  | 85.1±3.7  | 84.8±4.0  | 82.4±1.6        |
| Moscow region                            | 92.0±1.9                                         | 87.3±3.1  | 84.3±2.9  | 81.2±3.1  | 77.6±3.4  | 76.5±3.5  | 83.8±3.3  | 83.4±1.1        |
| Murmansk region                          | 92.9±2.2                                         | 92.5±2.1  | 89.1±2.3  | 89.3±2.3  | 92.0±2.3  | 74.1±4.8  | 85.2±4.0  | 89.0±1.0        |
| Nizhny Novgorod Region                   | 92.6±3.6                                         | 86.4±5.3  | 86.5±4.1  | 89.4±3.2  | 70.3±5.8  | 100       | 100       | 88.4±1.5        |
| Novosibirsk region                       | 98±2.0                                           | 100       | 89.5±7.0  | 94.7±3.6  | 90.3±5.3  | 93.3±4.5  | 94.6±3.0  | 94.7±1.4        |
| Primorsky territory                      | 100                                              | 98.0±2.0  | 98.5±1.5  | 98.8±1.2  | 98.8±1.2  | 93.3±2.9  | 100       | 98.3±0.6        |
| Republic of Crimea                       | 100                                              | 95.8±4.1  | 100       | 95.8±4.1  | 100       | 93.0±6.8  | 100       | 97.6±1.4        |
| Republic of Tatarstan                    | 98.7±0.9                                         | 97.7±1.3  | 90.5±2.5  | 91.6±2.4  | 90.9±2.3  | 93.4±2.3  | 100       | 94.5±0.8        |
| Rostov region                            | 99.2±0.8                                         | 96.2±2.6  | 98.3±1.7  | 93.9±2.6  | 95.3±2.6  | 98.6±1.4  | 98.0±2.0  | 97.2±0.7        |
| St. Petersburg city                      | 85.9±3.2                                         | 81.9±4.2  | 91.6±2.8  | 88.6±3.4  | 80.0±3.9  | 82.0±3.4  | 82.4±4.1  | 84.5±1.4        |
| Saratov region                           | 91.9±3.2                                         | 87.6±3.5  | 96.0±1.9  | 87±3.5    | 90.1±3.1  | 91.2±3.4  | 97±2.9*   | 91.1±1.2        |
| Sverdlovsk region                        | 91.7±3.2                                         | 92.3±3.7  | 89.4±3.8  | 100       | 100       | 96.1±2.7  | 95.0±2.8  | 94.4±1.2        |
| Stavropol Territory                      | 90.8±3.6                                         | 97.2±2.7  | 100       | 94.4±5.4  | 93.9±4.2  | 86.8±5.5  | 85.4±5.5  | 92.0±1.7        |
| Tula region                              | 95.8±2.9                                         | 94.0±3.4  | 74.1±5.8  | 82.8±4.7  | 78.5±5.1  | 80.9±4.2  | 95.4±2.2  | 85.7±1.6        |
| Tyumen region                            | 98.9±2.1                                         | 95.2±3.8  | 96.6±3.3  | 100.0±1.9 | 97.6±2.7  | 98.8±2.3  | 100       | 97.8±1.1        |
| Khabarovsk territory                     | 94.3±4.8                                         | 95.9±4.6  | 91.5±7.1  | 98.2±3.5  | 88.8±6.9  | 94.0±5.1  | 94.2±4.9  | 93.7±2.1        |
| Chelyabinsk region                       | 94.7±2.6                                         | 94.6±2.3  | 94.6±2.6  | 94.0±2.6  | 97.1±2.0  | 91.3±3.4  | 100       | 95.0±0.9        |
| median (Me)                              | 94.5                                             | 92.4      | 91.6      | 92.2      | 90.6      | 93.3      | 95.8      | 93.6            |
| IQR (Q <sub>25</sub> : Q <sub>75</sub> ) | 92-97.9                                          | 88.0-95.9 | 87.2-96.4 | 87.2-95.5 | 80.6-95   | 85.2-95.9 | 88.8-100  | 87.1-94.9       |

Note. Given the predominance of mean values close to 100%, we replaced the calculation of the 95% CI with the calculation of the mean percentage error.

### Supplementary References

1. Popova, A.Y.; Andreeva, E.E.; Babura, E.A.; Balakhonov, S.V.; Bashketova, N.S.; Bulanov, M.V.; Valeullina, N.N.; Goryaev, D.V.; Detkovskaya, N.N.; Ezhlova, E.B.; et al Features of developing SARS-CoV-2 nucleocapsid protein population-based seroprevalence during the first wave of the COVID-19 epidemic in the Russian Federation. *Russ. J. Infect. Immun. [Infektsiya I Immun.]* **2021**, *11*, 297–323. (In Russian) doi:10.15789/2220-7619-FOD-1684.
